# Supplementary material
Source: Springer Nature journal article supplement (https://www.springermedizin.de/resource/supplementary/12960_2009_203_MOESM1_ESM.pdf/9570646)

Excessive demand

41%

Inadequate infrastructure

51%

Insufficient equipment

66%

Medications out of stock

80%

0%

10%

20%

30%

40%

50%

60%

70%

80%

90%

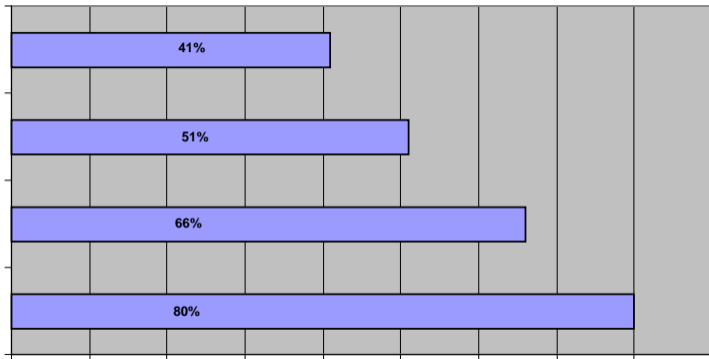

Supplement: MOESM1 [file 9570646]
